# Supplementary material for: On the role of local heating in cathode degradation during the oxygen reduction reaction in solid acid fuel cells
Source: Royal Society of Chemistry journal article supplement (doi:10.1039/d0se00842g), 2020-01-01
Supplement: d0se00842g1.pdf [file d0se00842g1.pdf]

## 1 Electronic Supplementary Information (ESI)

2

### 3 **On the role of local heating on cathode degradation during the** 4 **oxygen reduction reaction in solid acid fuel cells**

5 Maximilian Wagner<sup>a†</sup>, Oliver Lorenz<sup>a</sup>, Felix P. Lohmann-Richters<sup>b</sup>, Aron Varga<sup>a</sup> and Bernd Abel<sup>a</sup>

6 <sup>a</sup>Leibniz Institute for Surface Engineering, Chemical Department, Permoserstraße 15, 04318  
7 Leipzig, Germany

8 <sup>b</sup>Forschungszentrum Jülich GmbH, Institut für Energie- und Klimaforschung - Elektrochemische  
9 Verfahrenstechnik (IEK-14), 52425 Jülich, Germany

10 <sup>c</sup>BMW Group, Department Electrical Drive Development, Taunusstraße 41, 80807 Munich,  
11 Germany

12

13 †Corresponding author. Email: maximilian.wagner@iom-leipzig.de, Tel.: +49 341 235 3365

14

### 15 **S1: Mass normalized current density**

16 CP/Pt@CDP<sub>porous</sub>-MEAs achieve current densities during cell I-V characterization of up 150 mA cm<sup>-2</sup>  
17 with a platinum loading of 64 µg cm<sup>-2</sup> per electrode (as published previously).<sup>[1]</sup> This results in a  
18 platinum normalized current density of about 2300 mA mg<sub>Pt</sub><sup>-1</sup>. State of the art solid acid fuel cells with  
19 a powder electrode were reported by Papandrew et al. with maximum current densities of 1.2 A cm<sup>-2</sup>  
20 during I-V characterization and a platinum loading of 1.75 mg cm<sup>-2</sup>, resulting in 685 mA mg<sub>Pt</sub><sup>-1</sup>.<sup>[2]</sup>

### 21 **S2: Electrode generation using a spray drying process**

22 Set of spray dryer and precursor parameters used to deposit porous CsH<sub>2</sub>PO<sub>4</sub> electrodes as reported previously. <sup>[1]</sup>

| Precursor parameters                      |                     |                       | Spray dryer parameters |                          |                                    |                       |
|-------------------------------------------|---------------------|-----------------------|------------------------|--------------------------|------------------------------------|-----------------------|
| CsH <sub>2</sub> PO <sub>4</sub><br>conc. | Methanol<br>content | PVP conc.             | Temp.                  | Carrier gas<br>flow rate | Precursor<br>solution flow<br>rate | Atomizer<br>mesh size |
| 10 g l <sup>-1</sup>                      | 44 wt%              | 0.3 g l <sup>-1</sup> | 303 K                  | 80 l min <sup>-1</sup>   | 1.5 ml min <sup>-1</sup>           | 4 µm                  |

23

24 Previously optimized precursor and spray parameters were used for the spray drying process.<sup>[1]</sup> To  
25 generate a 15 µm thick porous layer, a spraying time of 100 min was needed. The porous structure  
26 was applied to both sides of a CsH<sub>2</sub>PO<sub>4</sub> pellet one by one. A costume made holder was used to prevent  
27 damage to the already modified side.

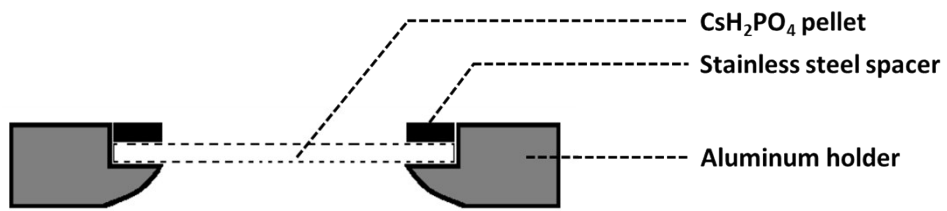

1

2 Custom made cell holder to protect the generated porous structure.

---

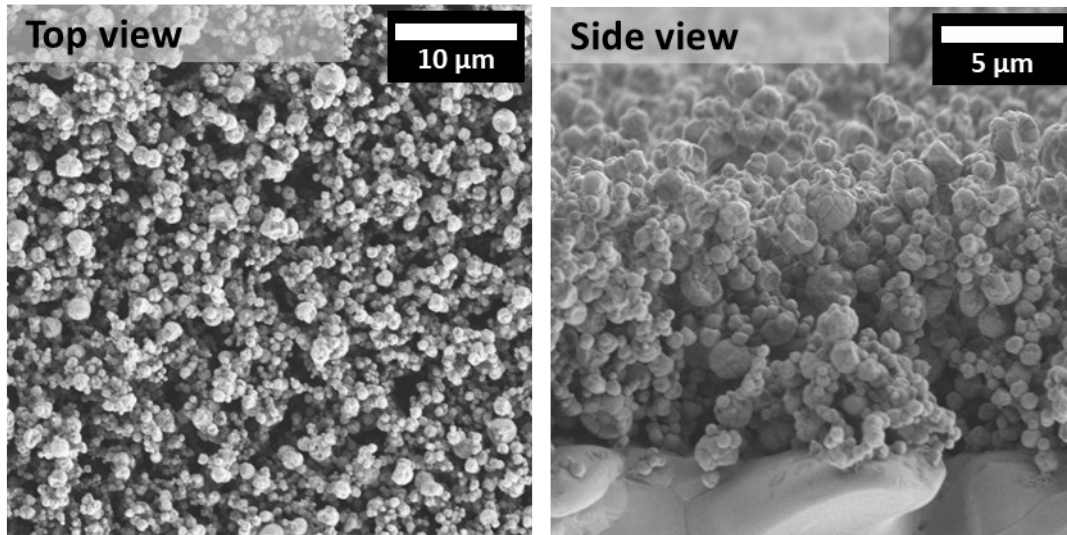

3

4 Representative SEM micrographs of the porous electrode after the spray drying process.

---

### 5 S3: Open circuit voltage

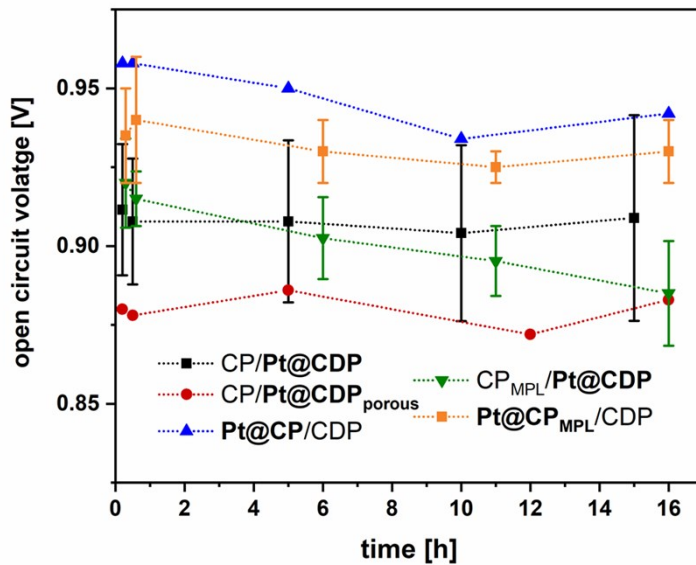

6

7 Open circuit potential for all MEA types over time. No significant change in the open circuit voltage was detected within the  
8 measurement time.

---

## 1 S4: X-ray diffraction experiment

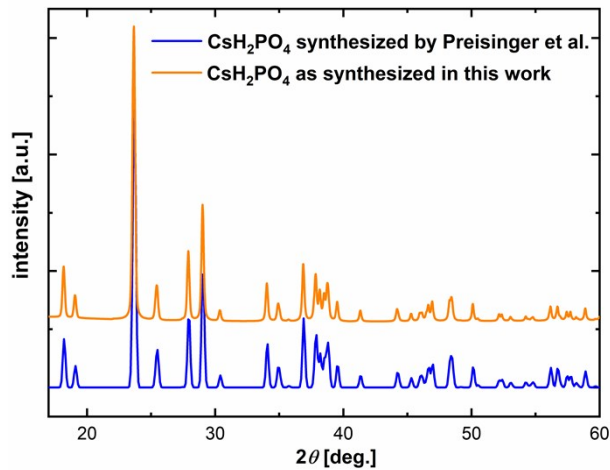

2

3 X-ray diffraction experiments to control the purity of the CsH<sub>2</sub>PO<sub>4</sub> after synthesis at 25°C. A G670 Guinier Camera (Huber)  
4 using copper K<sub>α</sub> radiation ( $\lambda = 1.541 \text{ \AA}$ ) and a  $2\theta$ -range between 15° and 70° was used. Diffractogram was compared to results  
5 of pure CsH<sub>2</sub>PO<sub>4</sub> at 25°C published by Preisinger et al.<sup>[5]</sup>

## 6 S5: Impedance measurements

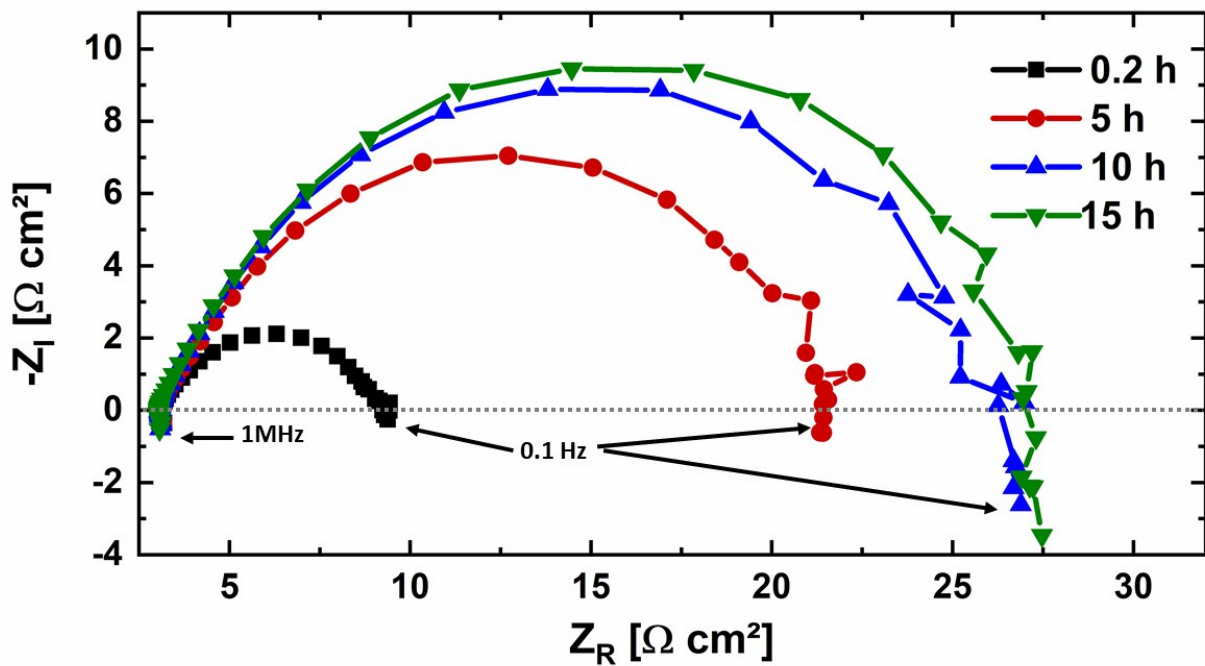

7

8 CP/Pt@CDP: staircase potential electrochemical impedance spectroscopy (SPEIS) after different times for voltages of 0.35 V.  
9 Voltage of 0.05 V is discussed in detail in the manuscript.

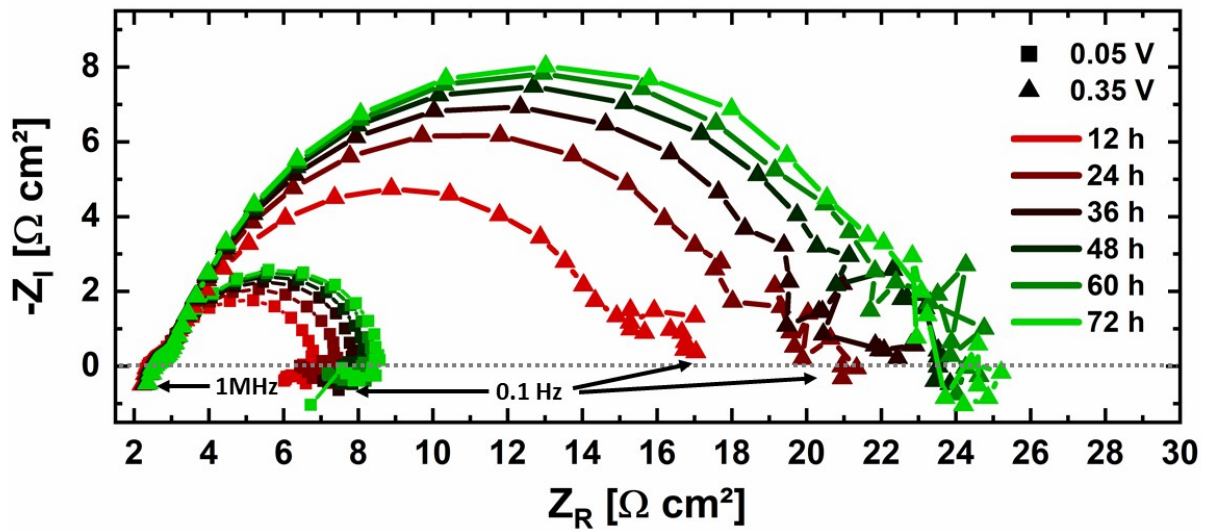

2 CP/Pt@CDP<sub>porous</sub>: staircase potential electrochemical impedance spectroscopy (SPEIS) after different times for voltages  $U =$   
 3 0.05 V and 0.35 V. Time is indicated by the colour and the respective voltage by the symbol.

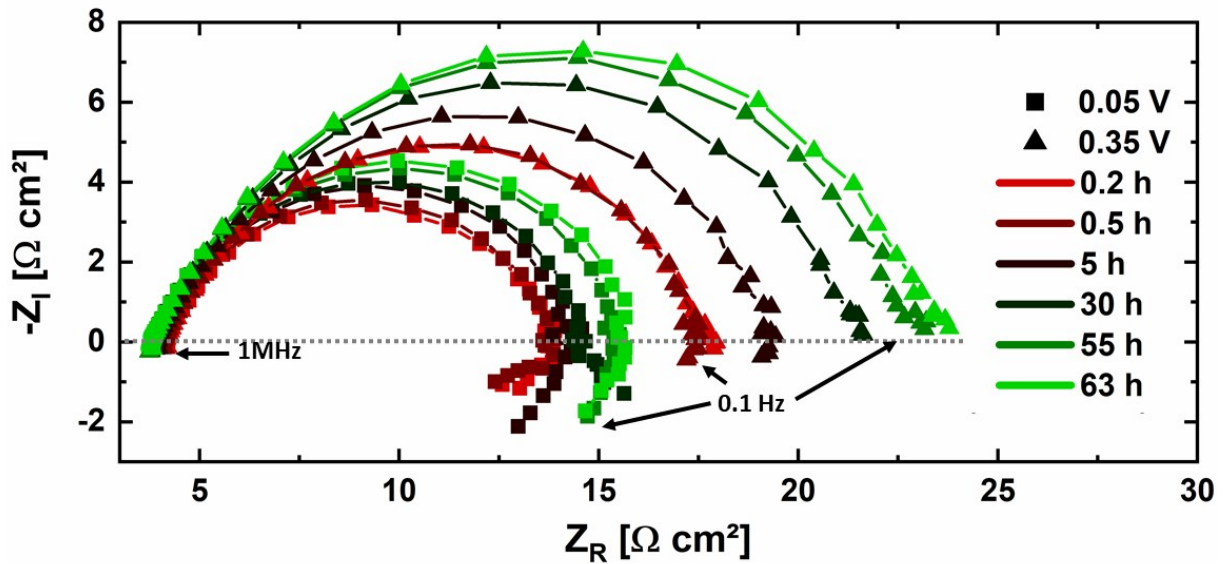

5 Pt@CP/CDP: staircase potential electrochemical impedance spectroscopy (SPEIS) after different times for voltages  $U =$  0.05 V  
 6 and 0.35 V. Time is indicated by the colour and the respective voltage by the symbol.

1

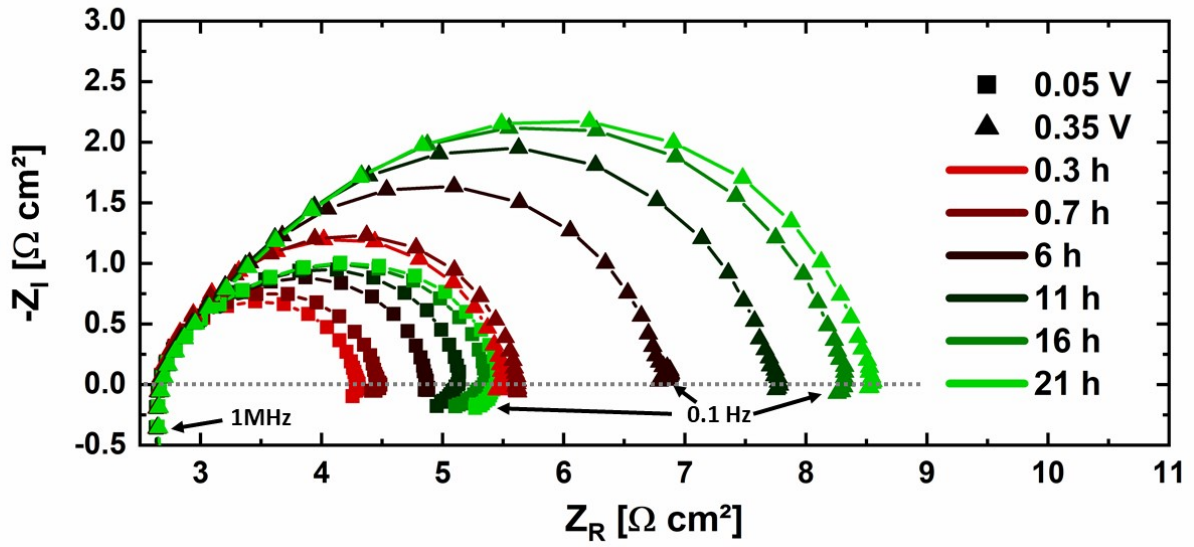

2

3 Pt@CP<sub>MPL</sub>/CDP-MEA: staircase potential electrochemical impedance spectroscopy (SPEIS) after different times for voltages U =  
4 = 0.05 V and 0.35 V. Time is indicated by the colour and the respective voltage by the symbol.

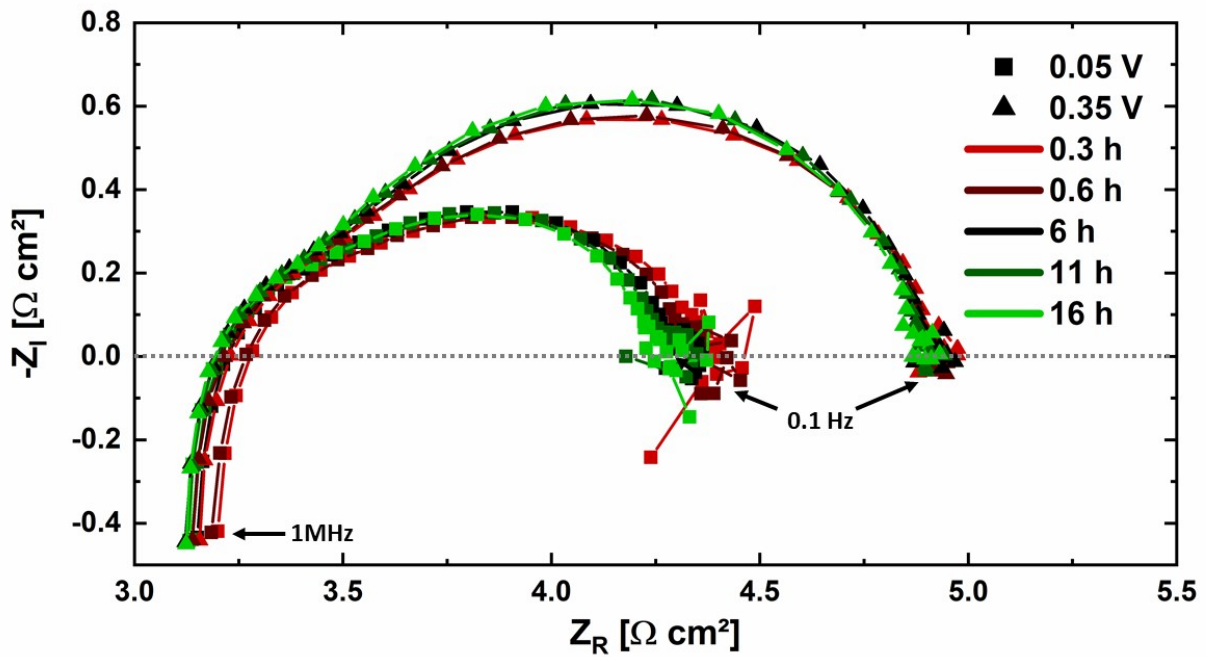

5

6 CP<sub>MPL</sub>/Pt@CDP: staircase potential electrochemical impedance spectroscopy (SPEIS) after different times for voltages U =  
7 0.05 V and 0.35 V. Time is indicated by the colour and the respective voltage by the symbol.

1 **S6: SEM analyzation of CP<sub>MPL</sub>/Pt @CDP**

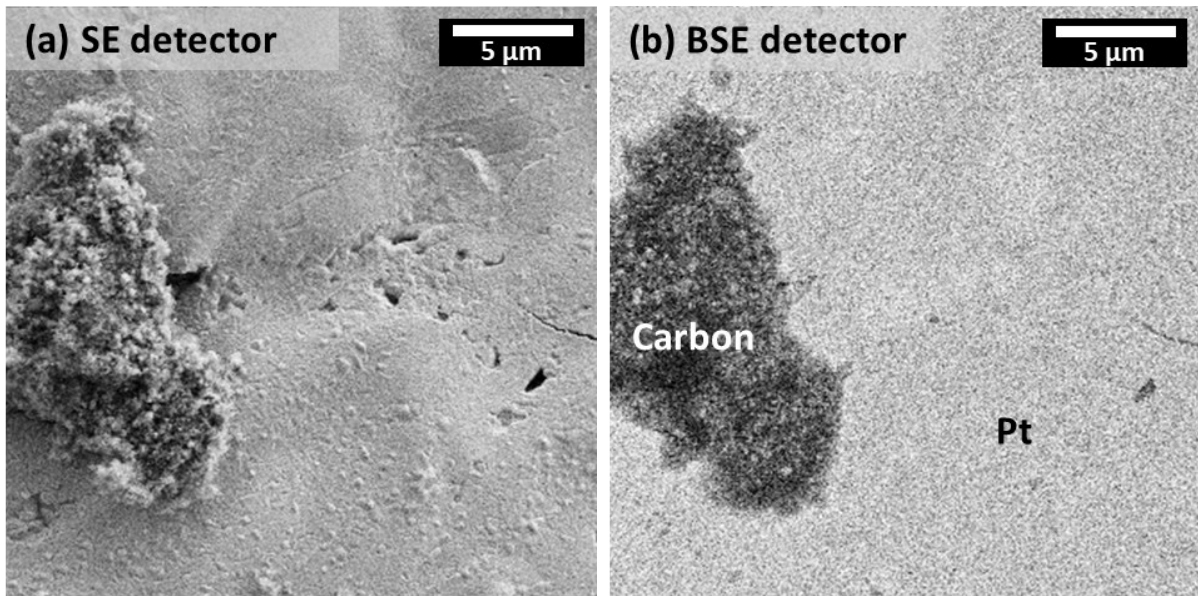

2

3 SEM micrographs of the CP<sub>MPL</sub>/Pt@CDP anode after carbon paper removal. (a) Secondary electron (SE) detector. (b) Back  
4 scattering electron (BSE) detector. Relevant phases are marked in (b).

---

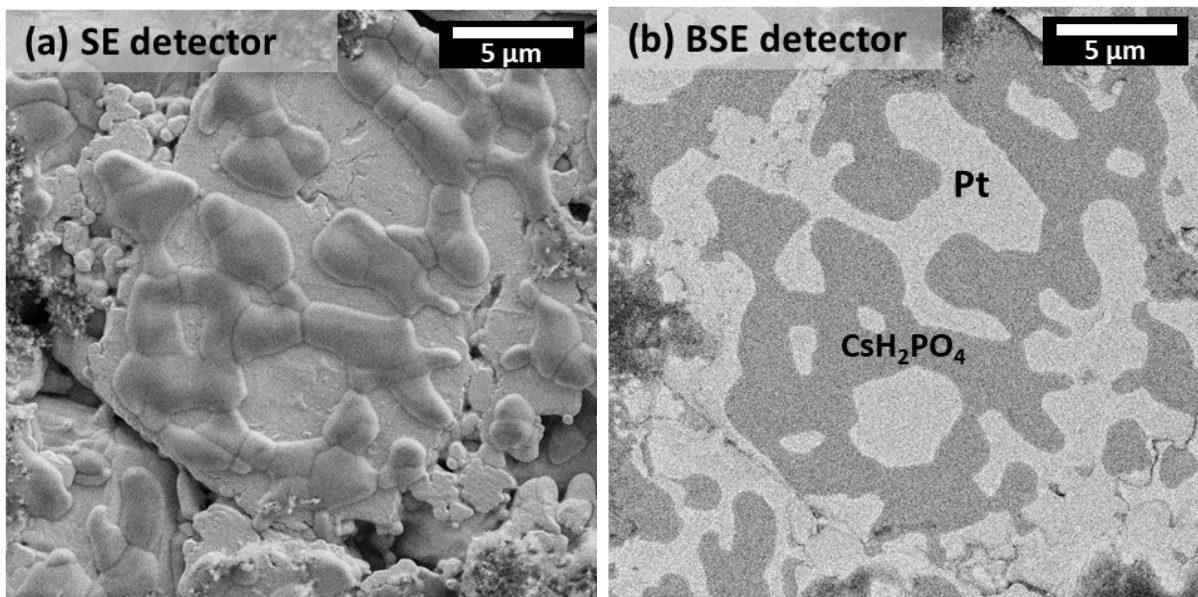

5

6 SEM micrographs of the CP<sub>MPL</sub>/Pt@CDP cathode after carbon paper removal. (a) Secondary electron (SE) detector. (b) Back  
7 scattering electron (BSE) detector. Relevant phases are marked in (b).

---

1 **S7: SEM analyzation Pt@CP<sub>MPL</sub>/CDP**

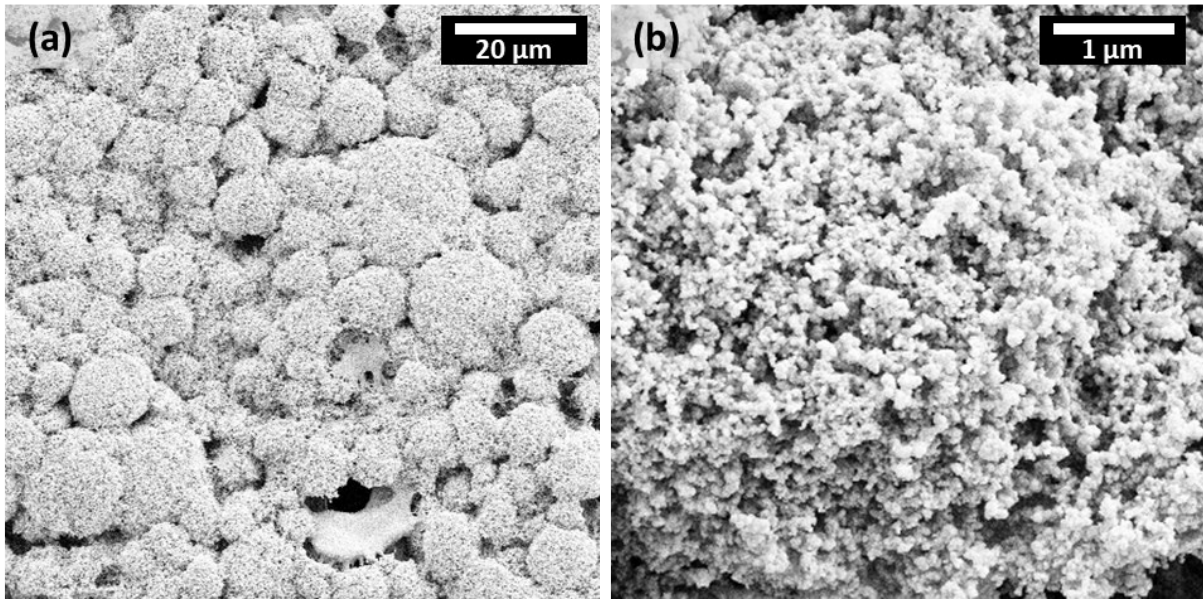

2  
3 SEM micrographs of the CP<sub>MPL</sub> after platinum deposition.

4 **S8: SEM analyzation Pt@CP/CDP**

5 Two different sections of the Pt@CP/CDP cathode surface were analyzed by SEM. During removal  
6 of the carbon paper, platinum occasionally detachment from the carbon fiber leaving behind a  
7 platinum coated imprint. Morphological changes of the electrolyte close to the imprint are visible.

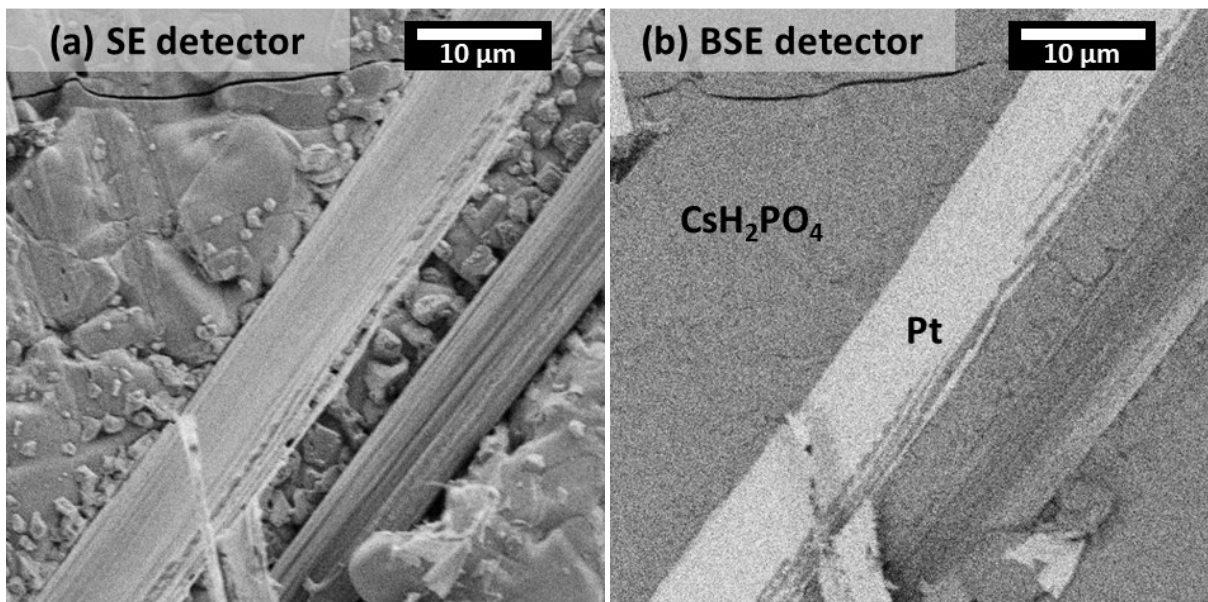

8  
9 SEM micrographs of the Pt@CP/CDP cathode after carbon paper removal. (a) Secondary electron (SE) detector. (b) Back  
10 scattering electron (BSE) detector. Relevant phases are marked in (b).

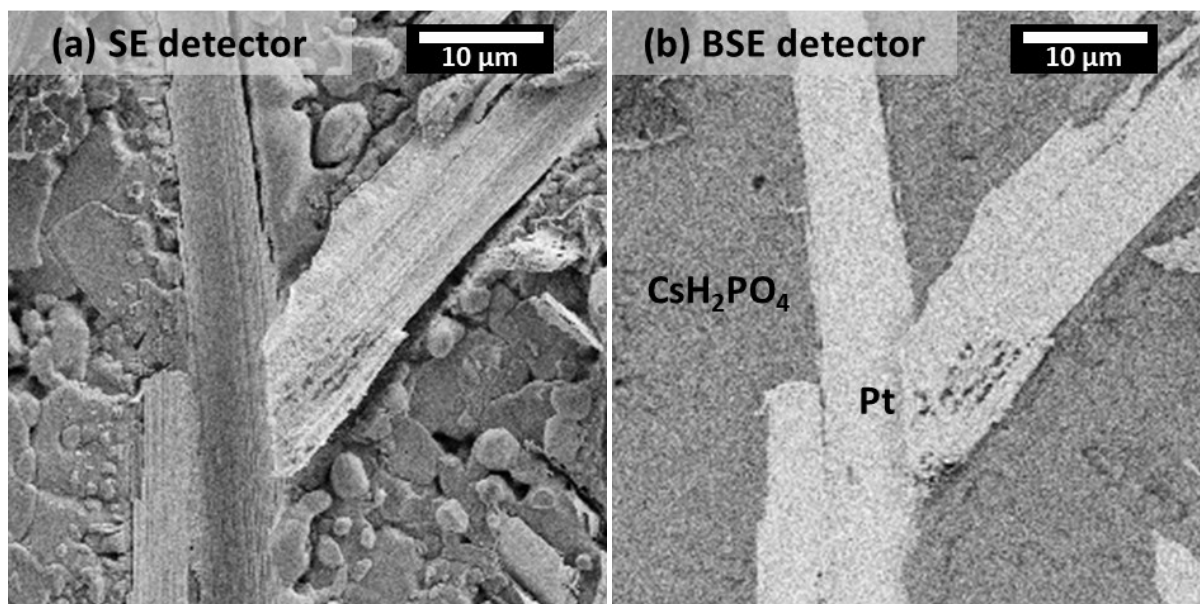

1

2 SEM micrographs of the **Pt@CP/CDP** cathode after carbon paper removal. (a) Secondary electron (SE) detector. (b) Back  
 3 scattering electron (BSE) detector. Relevant phases are marked in (b).

#### 4 **S9: Contact area $\text{CsH}_2\text{PO}_4$ – Platinum**

5 After measuring platinum plated carbon paper (CP) electrodes, the carbon paper was removed prior  
 6 to scanning electron microscope (SEM) investigation. At areas where carbon strands were in contact  
 7 with the  $\text{CsH}_2\text{PO}_4$  surface, imprints can be seen on the surface. During the removal process, platinum  
 8 detached from the carbon fibers and is present at the electrolyte surface. Using a back-scattering  
 9 detector, a high material contrast could be achieved for magnifications between 500 and 1000  
 10 depending on the sample, making an image processing with the image J software (Version 1.52t)  
 11 possible. Representative overlays of the SEM micrographs and contact area determined by the image  
 12 processing are shown. There is a large variation between the samples, resulting in a relatively large  
 13 standard deviation. Since this analysis was designed to provide a rough overview of the area coverage  
 14 the scale of 7 measurements was considered sufficient by the authors.

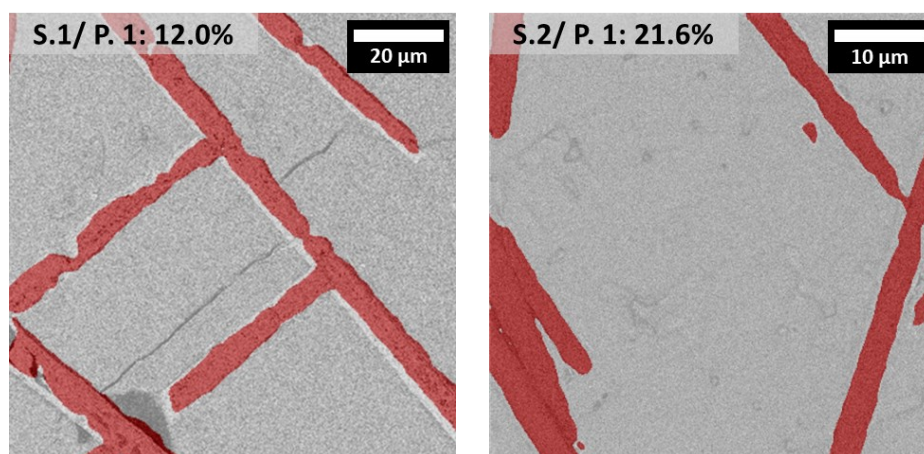

15

16 Representative overlays of the SEM micrographs and contact area determined by the image processing for sample 1, position  
 17 1 (S.1/P.1) and sample 2, position 1 (S.2/P.1).



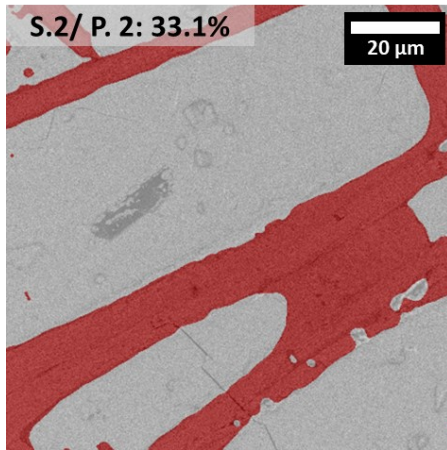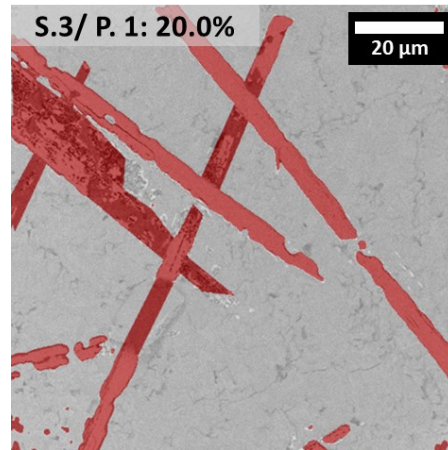

1

2 Representative overlays of the SEM micrographs and contact area determined by the image processing for sample 2, position  
3 2 (S.2/P.2) and sample 3, position 1 (S.3/P.1).

---

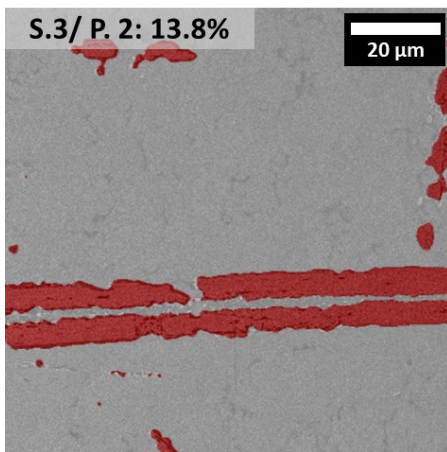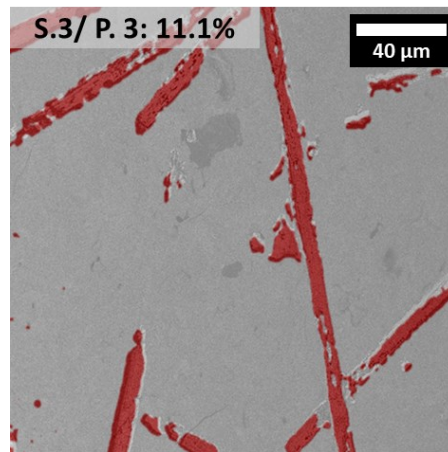

4

5 Figure S 3 Representative overlays of the SEM micrographs and contact area determined by the image processing for  
6 sample 3, position 2 (S.3/P.2) and sample 3, position 3 (S.3/P.3).

---

7

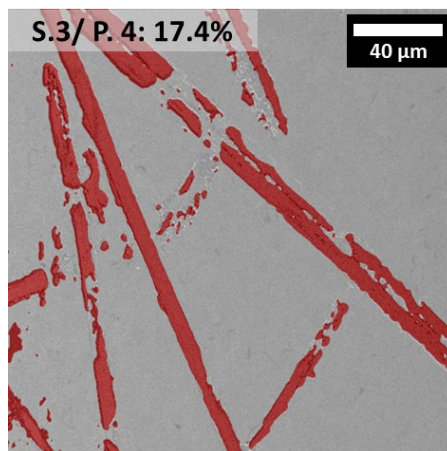

8

9 Figure S 4 Representative overlays of the SEM micrographs and contact area determined by the image processing for  
10 sample 3, position 4 (S.3/P.4).

---

- 1 Results of analyzing a total of 7 different locations on 3 different cells are summarized in the table.  
 2 Overall, an area coverage of  $18 \pm 9\%$  was obtained. Which represents a considerable decrease of the  
 3 platinum coverage compared to the completely covered platinum thin film electrodes.  
 4 Results of analyzing a total of 7 different locations on 3 different cells. An overall coverage of  $18 \pm 9\%$  was obtained.

| Sample | Position | Area coverage [%] |
|--------|----------|-------------------|
| 1      | 1        | 12.0              |
| 2      | 1        | 21.6              |
| 2      | 2        | 33.1              |
| 3      | 1        | 20.0              |
| 3      | 2        | 13.8              |
| 3      | 3        | 11.1              |
| 3      | 4        | 17.4              |

5

## 6 S10: Calculation of the sheet resistance

7 At  $20^\circ\text{C}$ , platinum bulk metal has an electrical resistivity of  $1.05 \cdot 10^{-7} \Omega \text{ m}$ . With a thickness of 30 nm,  
 8 the electrical resistivity of the platinum thin film can be described in good approximation with bulk  
 9 behavior.<sup>[3]</sup> With a temperature coefficient " $\alpha$ " of  $0,003927 \text{ K}^{-1}$  and  $\Delta T = 220^\circ\text{C}$ , the resulting electrical  
 10 resistivity " $\rho$ " at operating temperature of  $240^\circ\text{C}$  can be calculated by: <sup>[4]</sup>

$$11 \rho_{240^\circ\text{C}} = \rho_{20^\circ\text{C}} * (1 + \alpha \Delta T) = 1,05 * 10^{-7} * (1 + 0,86394) \Omega \text{ m} = 1,98 * 10^{-7} \Omega \text{ m}$$

12 The resulting sheet resistance for a layer thickness of  $t = 30 \text{ nm}$  can be calculated by:

$$13 R_{S,240^\circ\text{C}} = \frac{\rho_{240^\circ\text{C}}}{t} = \frac{1,98 * 10^{-7} \Omega \text{ m}}{3,0 * 10^{-8} \text{ m}} = 6,6 \Omega$$

14

## 15 References

- 16 [1] Wagner, M.; Dreßler, C.; Lohmann-Richters, F. P.; Hanus, K.; Sebastiani, D.; Varga, A.; Abel, B., *J.*  
 17 *Mater. Chem. A*, (2019) **7**, 27367.  
 18 [2] Papandrew, A. B.; Chisholm, C. R.I.; Elgammal, R. A.; Özer, M. M.; Zecevic, S. K., *Chem. Mater.*, (2011)  
 19 **23**, 1659.  
 20 [3] Avrekh, M.; Monteiro, O.R.; Brown, I.G., *Applied Surface Science*, (2000) **158**, 217.  
 21 [4] Serway, R. A., *Principles of physics*, (1998-), Fort Worth, Saunders College Pub.  
 22 [5] Preisinger, A.; Mereiter, K.; Bronowska, W., *MSF*, (1994) **166-169**, 511.

23
